# Supplementary material for: Musculoskeletal Complaints in Occupational Therapists Compared to the General Population: A Cross-Sectional Study in Germany
Source: MDPI journal article supplement (doi:10.3390/ijerph17144916), 2020-07-08
Supplement: s1 [file s1]

**Supplementary table S1.** Work-related exposures for musculoskeletal complaints

|                                                          | Occupational<br>therapists (n=196) | Comparison<br>group (n=285) | p-value |        |
|----------------------------------------------------------|------------------------------------|-----------------------------|---------|--------|
| <b>Hand activity level; n (%)</b>                        |                                    |                             |         |        |
| Frequently, long pauses                                  | 19 (9.8%)                          | 34 (20.1%)                  | 0.003   |        |
| Steady motion, rare pauses                               | 148 (76.3%)                        | 102 (60.4%)                 |         |        |
| Rapid steady motion, no pauses                           | 27 (13.9%)                         | 33 (19.5%)                  |         |        |
| Total; n                                                 | 194                                | 169                         |         |        |
| <b>Hand force; n (%)</b>                                 |                                    |                             |         |        |
| Low                                                      | 43 (21.9%)                         | 141 (62.9%)                 | <0.001  |        |
| Moderate                                                 | 107 (54.6%)                        | 55 (24.6%)                  |         |        |
| Big                                                      | 46 (23.5%)                         | 28 (12.5%)                  |         |        |
| Total; n                                                 | 196                                | 224                         |         |        |
| <b>Hand activity level threshold limit values; n (%)</b> |                                    |                             |         |        |
| Below HAL TLV                                            | 91 (46.9%)                         | 118 (70.7%)                 | <0.001  |        |
| Between AL and TLV                                       | 46 (23.7%)                         | 16 (9.6%)                   |         |        |
| Above HAL TLV                                            | 57 (29.4%)                         | 33 (19.8%)                  |         |        |
| <b>Bent and twisted; n (%)</b>                           |                                    |                             |         |        |
| Never                                                    | 55 (28.2%)                         | 51 (65.4%)                  |         | <0.001 |
| Sometimes                                                | 119 (61.0%)                        | 22 (28.2%)                  |         |        |
| Often                                                    | 21 (10.8%)                         | 5 (6.4%)                    |         |        |
| Total; n                                                 | 195                                | 78                          |         |        |
| <b>Bent (75°); n (%)</b>                                 |                                    |                             |         |        |
| Never                                                    | 34 (17.7%)                         | 36 (46.8%)                  | <0.001  |        |
| Sometimes                                                | 118 (61.5%)                        | 28 (36.4%)                  |         |        |
| Often                                                    | 40 (20.8%)                         | 13 (16.9%)                  |         |        |
| Total; n                                                 | 192                                | 77                          |         |        |
| <b>Bent (45°); n (%)</b>                                 |                                    |                             |         |        |
| Never                                                    | 13 (6.6%)                          | 22 (27.5%)                  | <0.001  |        |
| Sometimes                                                | 48 (24.5%)                         | 38 (47.5%)                  |         |        |
| Often                                                    | 135 (68.9%)                        | 20 (25.0%)                  |         |        |
| Total; n                                                 | 196                                | 80                          |         |        |
| <b>Upright and twisted; n (%)</b>                        |                                    |                             |         |        |
| Never                                                    | 18 (9.2%)                          | 40 (51.3%)                  | <0.001  |        |
| Sometimes                                                | 72 (36.7%)                         | 23 (29.5%)                  |         |        |
| Often                                                    | 106 (54.1%)                        | 15 (19.2%)                  |         |        |
| Total; n                                                 | 196                                | 78                          |         |        |
| <b>Bent (20°); n (%)</b>                                 |                                    |                             |         |        |
| Never                                                    | 38 (19.4%)                         | 18 (22.8%)                  | 0.685   |        |
| Sometimes                                                | 90 (45.9%)                         | 32 (40.5%)                  |         |        |
| Often                                                    | 68 (34.7%)                         | 29 (36.7%)                  |         |        |
| Total; n                                                 | 196                                | 79                          |         |        |
| <b>Extreme torso flexion (&gt; 90°); n (%)</b>           |                                    |                             |         |        |
| Never                                                    | 76 (39.8%)                         | 62 (77.5%)                  | <0.001  |        |
| Sometimes                                                | 99 (51.8%)                         | 13 (16.3%)                  |         |        |
| Often                                                    | 16 (8.4%)                          | 5 (6.3%)                    |         |        |
| Total; n                                                 | 191                                | 80                          |         |        |
| <b>Bent and torso flexion (45- 90°); n (%)</b>           |                                    |                             |         |        |
| Never                                                    | 15 (7.7%)                          | 39 (48.8%)                  |         |        |
| Sometimes                                                | 109 (56.2%)                        | 29 (36.3%)                  |         |        |
| Often                                                    | 70 (36.1%)                         | 12 (15.0%)                  |         |        |

|                                     |             |            |        |
|-------------------------------------|-------------|------------|--------|
| Total; n                            | 194         | 80         | <0.001 |
| <b>Working squatting; n (%)</b>     |             |            |        |
| Never                               | 30 (15.4%)  | 50 (62.5%) |        |
| Sometimes                           | 107 (54.9%) | 23 (28.7%) |        |
| Often                               | 58 (29.7%)  | 7 (8.8%)   |        |
| Total; n                            | 195         | 80         | <0.001 |
| <b>Kneeling work; n (%)</b>         |             |            |        |
| Never                               | 36 (18.5%)  | 57 (71.3%) |        |
| Sometimes                           | 109 (55.9%) | 16 (20.0%) |        |
| Often                               | 50 (25.6%)  | 7 (8.8%)   |        |
| Total; n                            | 195         | 80         | <0.001 |
| <b>Hands over shoulders; n (%)</b>  |             |            |        |
| Never                               | 33 (16.9%)  | 47 (58.8%) |        |
| Sometimes                           | 121 (62.1%) | 26 (32.5%) |        |
| Often                               | 41 (21.0%)  | 7 (8.8%)   |        |
| Total; n                            | 195         | 80         | <0.001 |
| <b>Work in heel position; n (%)</b> |             |            |        |
| Never                               | 46 (23.6%)  | 63 (78.8%) |        |
| Sometimes                           | 101 (51.8%) | 11 (13.8%) |        |
| Often                               | 48 (24.6%)  | 6 (7.5%)   |        |
| Total; n                            | 195         | 80         | <0.001 |
